# Supplementary material for: Off-Nadir Hyperspectral Sensing for Estimation of Vertical Profile of Leaf Chlorophyll Content within Wheat Canopies
Source: MDPI journal article supplement (doi:10.3390/s17122711), 2017-11-23
Supplement: s1 [file s1]

# Supplementary Materials: Off-Nadir Hyperspectral Sensing for Estimation of Vertical Profile of Leaf Chlorophyll Content within Wheat Canopies

Weiping Kong <sup>1,2</sup>, Wenjiang Huang <sup>1,3,\*</sup>, Raffaele Casa <sup>4</sup>, Xianfeng Zhou <sup>1</sup>, Huichun Ye <sup>1</sup> and Yingying Dong <sup>1</sup>

<sup>1</sup> Key Laboratory of Digital Earth Science, Institute of Remote Sensing and Digital Earth, Chinese Academy of Sciences, Beijing 100094, China; kongwp@radi.ac.cn (W.K.); zhouxf@radi.ac.cn (X.Z.); yehuichun000@126.com (H.Y.); dongyy@radi.ac.cn (Y.D.)

<sup>2</sup> University of Chinese Academy of Sciences, Beijing 100049, China

<sup>3</sup> State Key Laboratory of Remote Sensing Science, Institute of Remote Sensing and Digital Earth, Chinese Academy of Sciences, Beijing 100094, China

<sup>4</sup> Department of Agricultural and Forestry scieNcEs (DAFNE), Università degli Studi della Tuscia, Via San Camillo de Lellis, 01100 Viterbo, Italy; rcasa@unitus.it

\* Correspondence: huangwj@radi.ac.cn; Tel.: +86-10-82178169

Received: 14 September 2017; Accepted: 22 November 2017; Published: date

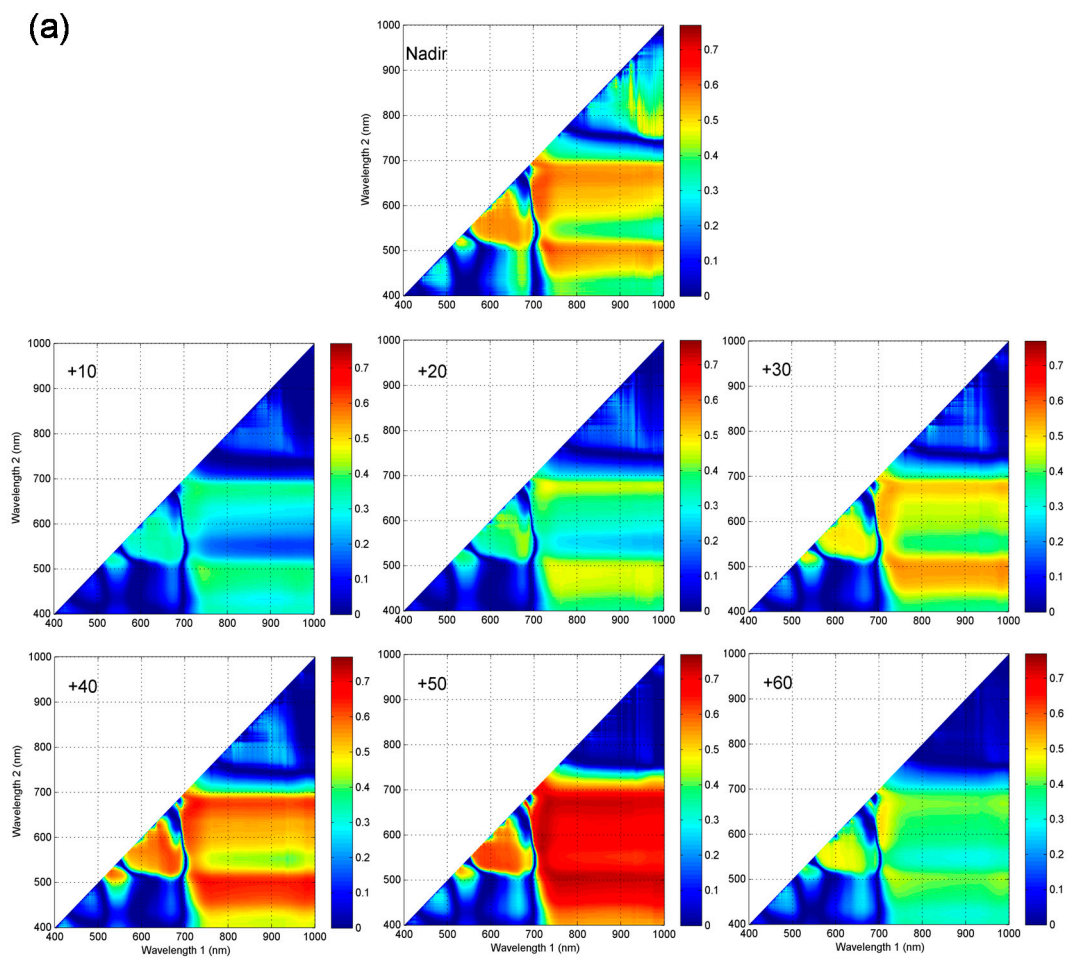

(b)

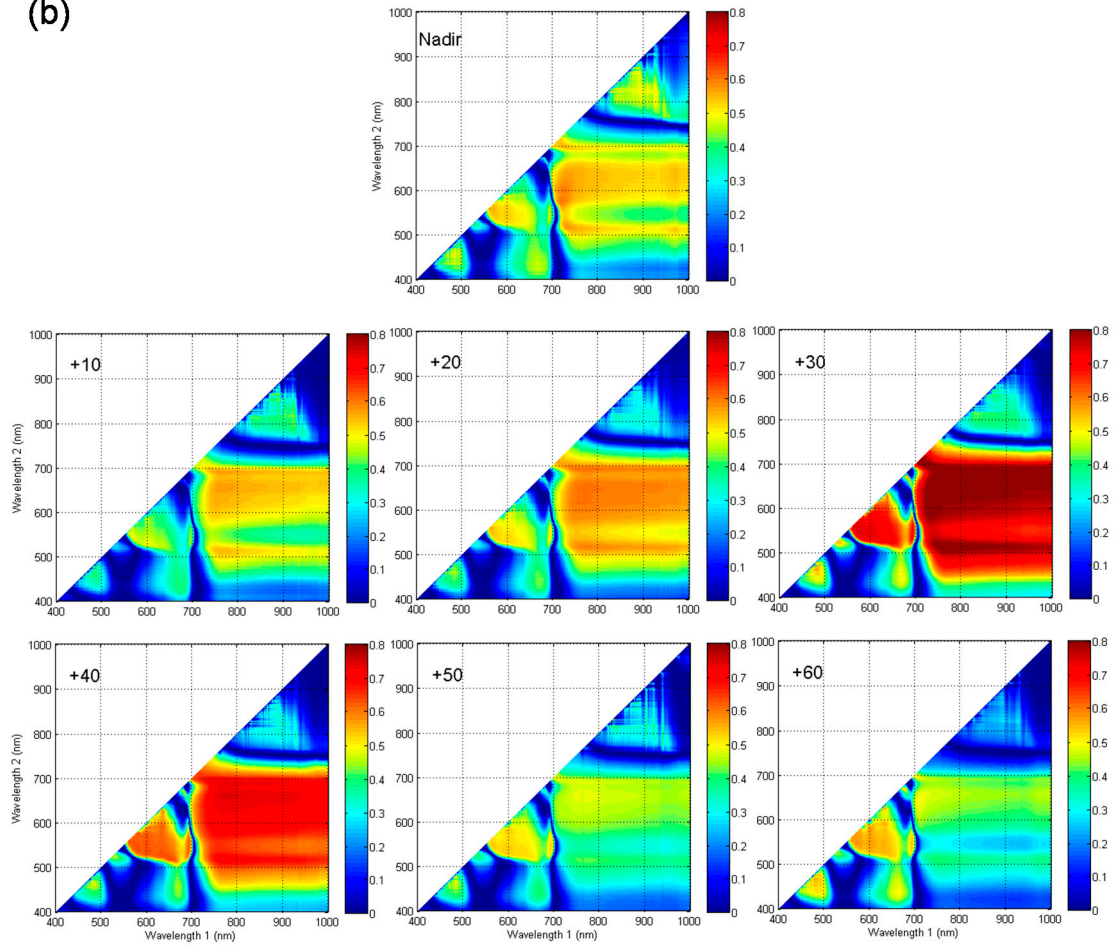

(c)

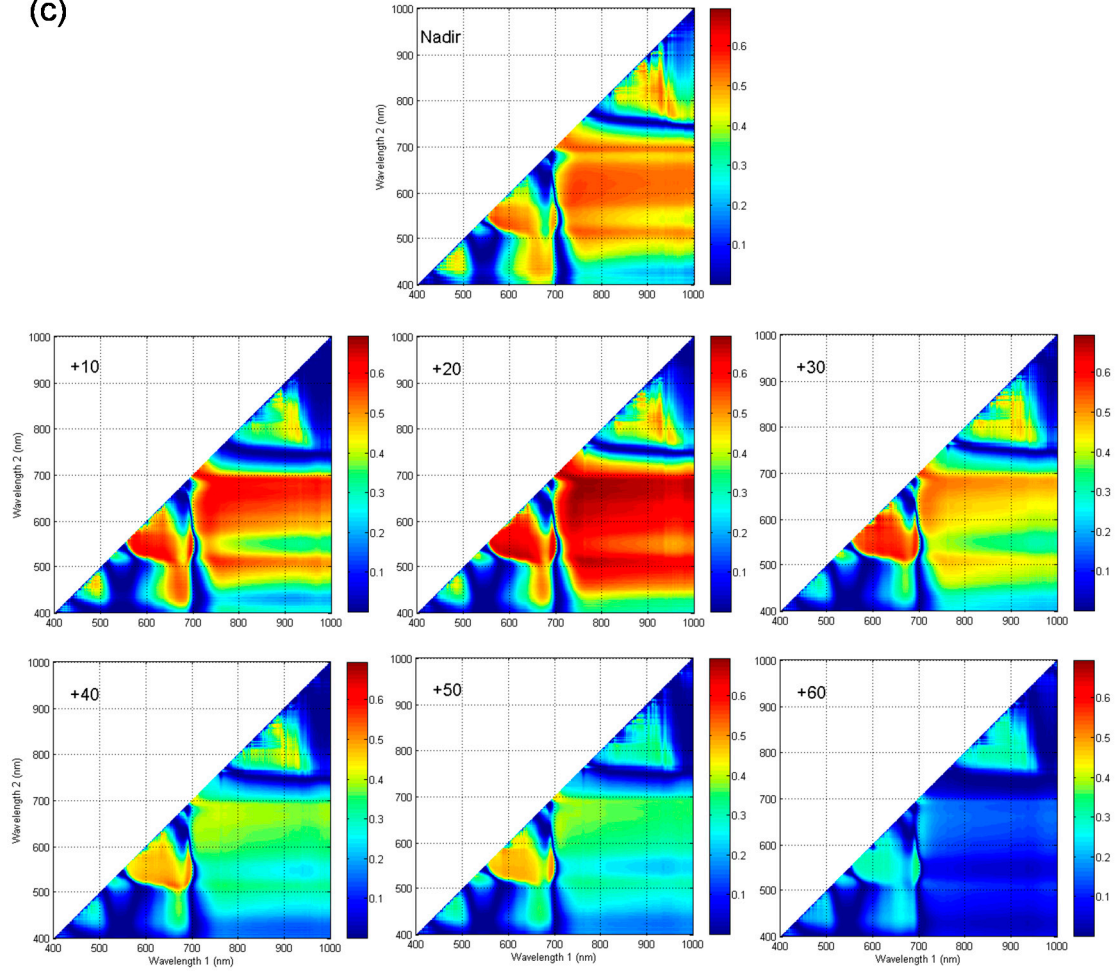

**Figure S1.** Contour maps of the coefficients of determination ( $R^2$ ) for the relationships between SR-like( $\lambda_1$ ,  $\lambda_2$ ) indices ( $\lambda_1$  and  $\lambda_2$  are wavelength 1 and wavelength 2 on the corresponding axes) calculated from all possible two-band combinations from 400 to 1000 nm and leaf Chl content in (a) the upper-layer, (b) the middle-layer, and (c) the bottom-layer at the nadir and six backscattering viewing angles, respectively.
